# Supplementary material
Source: HighWire-hosted journal article supplement (https://ard.bmj.com/content/annrheumdis-2020-217509)
Supplement: inline-supplementary-material-1 [file inline-supplementary-material-1.pdf]

|                                                        |             |
|--------------------------------------------------------|-------------|
| <b>You are a practicing</b>                            |             |
| Rheumatologist                                         | 188 (85.1%) |
| Internist                                              | 20 (9.1%)   |
| Pediatrician                                           | 8 (3.6%)    |
| Other                                                  | 5 (2.2%)    |
| <b>You treat</b>                                       |             |
| Adults                                                 | 119 (53.8%) |
| Children                                               | 13 (5.8%)   |
| Predominantly adults                                   | 86 (38.9%)  |
| Predominantly children                                 | 3 (1.3%)    |
| <b>Years in rheumatology practice (after training)</b> |             |
| <5                                                     | 89 (40.2%)  |
| 5-9                                                    | 46 (20.8%)  |
| 10-19                                                  | 59 (26.7%)  |
| >20                                                    | 27 (12.2%)  |
| <b>What is your age</b>                                |             |
| 25-30                                                  | 5 (2.2%)    |
| 30-34                                                  | 48 (21.7%)  |
| 35-44                                                  | 83 (37.5%)  |
| 45-54                                                  | 49 (22.1%)  |
| 55-64                                                  | 28 (12.6%)  |
| 65+                                                    | 8 (3.6%)    |
| <b>Gender</b>                                          |             |
| Male                                                   | 165 (74.6%) |
| Female                                                 | 56 (25.3%)  |
| <b>Where do you practice</b>                           |             |
| Academic institute                                     | 109 (52.2%) |
| Nonacademic hospital                                   | 61 (27.5%)  |
| Independent Practice                                   | 86 (38.8%)  |
| Other                                                  | 1 (0.4%)    |
| <b>Which country do you practice in</b>                |             |
| India                                                  | 212 (95.9%) |
| United Kingdom                                         | 1 (0.4%)    |
| United States                                          | 3 (1.3%)    |
| Canada                                                 | 3 (1.3%)    |
| Kuwait                                                 | 1 (0.4%)    |
| Oman                                                   | 1 (0.4%)    |
